# Supplementary material
Source: publisher figshare collection journal article supplement (https://karger.figshare.com/ndownloader/files/14065385)
Supplement: Supplementary file 1 [file 14065385]

**Supplemental Table 4- Baseline associations with biochemical measures of CKD-Mineral Bone Disease**

| **Gene** | **rsID** | **Baseline Measure** | **Meta-analysis Beta** | **Meta-analysis Std. Err.** | **Meta-analysis P value** | **EA Beta** | **AfAn Beta** | **EA Sample Size** | **AfAn Sample Size** |
| --- | --- | --- | --- | --- | --- | --- | --- | --- | --- |
| *FGF23* | rs11063112 | Calcium | -0.002 | 0.005 | 6.76E-01 | -0.005 | 0.005 | 1,024 | 399 |
| *FGF23* | rs13312789 | Calcium | -0.006 | 0.005 | 2.42E-01 | -0.010 | 0.001 | 1,028 | 399 |
| *FGF23* | rs11063112 | FGF23 | 0.023 | 0.079 | 7.69E-01 | 0.072 | -0.103 | 922 | 359 |
| *FGF23* | rs13312789 | FGF23 | 0.014 | 0.102 | 8.91E-01 | 0.081 | -0.142 | 925 | 359 |
| *FGF23* | rs11063112 | PTH | 0.036 | 0.019 | 5.53E-02 | 0.037 | 0.032 | 1,024 | 399 |
| *FGF23* | rs13312789 | PTH | 0.014 | 0.028 | 6.13E-01 | 0.007 | 0.043 | 1,028 | 399 |
| *FGF23* | rs11063112 | Phosphate | 0.004 | 0.019 | 8.39E-01 | 0.018 | -0.021 | 1,024 | 399 |
| *FGF23* | rs13312789 | Phosphate | 0.008 | 0.020 | 6.98E-01 | 0.022 | -0.020 | 1,028 | 399 |
| *FGF23* | rs11063112 | Vit D 25(OH) | -0.012 | 0.024 | 6.10E-01 | -0.017 | 0.007 | 1,051 | 404 |
| *FGF23* | rs13312789 | Vit D 25(OH) | 0.015 | 0.035 | 6.67E-01 | 0.010 | 0.029 | 1,055 | 404 |

Meta-analysis results for baseline biochemical measurements. Gene name (Gene), reference SNP ID number (rsID), Residualized baseline biochemical measurement (Baseline Measurement), Meta-analysis beta, standard error (std. err.) and p value, beta estimates among EA and AfAn samples (EA Beta, AfAn Beta), and sample sizes (EA sample size, AfAn sample size). EA= European Ancestry, AfAn= African Ancestry.
